# Supplementary material for: Identification and validation of prognostic autophagy-related genes associated with immune microenvironment in human gastric cancer
Source: publisher site journal article supplement (doi:10.18632/aging.204313), 2022-09-28
Supplement: Supplementary file [file aging-v14i18-204313-supplementary-material-SD1.pdf]

SUPPLEMENTARY FIGURE

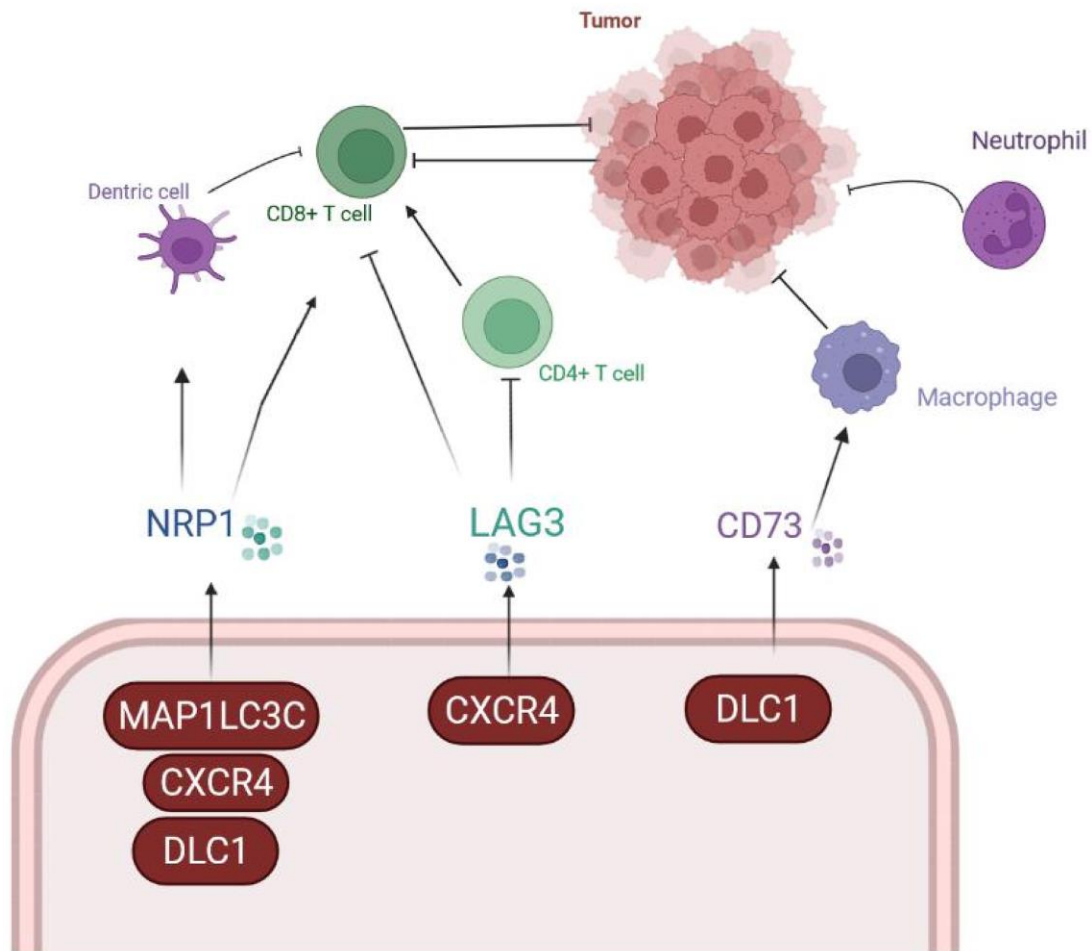

Supplementary Figure 1. The interactions between DE-ATGs and immune cells or surface markers of immune cells.
