# Supplementary material for: Identification and validation of prognostic autophagy-related genes associated with immune microenvironment in human gastric cancer
Source: publisher site journal article supplement (doi:10.18632/aging.204313), 2022-09-28
Supplement: Supplementary file [file aging-v14i18-204313-supplementary-material-SD2.pdf]

## SUPPLEMENTARY TABLE

Supplementary Table 1. Clinical and pathological characteristics of GC patients.

| Characteristics | Count | Percent (%) |
|-----------------|-------|-------------|
| Size            | 366   | 100         |
| Sex             |       |             |
| Male            | 232   | 63.40       |
| Female          | 134   | 36.60       |
| Size            |       |             |
| Age (years)     |       |             |
| ≥60             | 247   | 67.49       |
| <60             | 119   | 32.51       |
| Stage           |       |             |
| I-II            | 160   | 43.72       |
| III-IV          | 183   | 50.00       |
| unknown         | 23    | 6.28        |
| T-stage         |       |             |
| T1-T2           | 97    | 26.50       |
| T3-T4           | 261   | 71.31       |
| Tx              | 8     | 2.19        |
| N-stage         |       |             |
| N0              | 108   | 29.51       |
| N1-3            | 240   | 65.57       |
| Nx              | 18    | 4.92        |
| M-stage         |       |             |
| M0              | 322   | 87.98       |
| M1              | 44    | 12.02       |
| Grade           |       |             |
| G1&G2           | 144   | 39.34       |
| G3              | 213   | 58.20       |
| Gx              | 9     | 2.46        |
